# Supplementary material for: Physical activity shifts gut microbiota structure in aged subjects with overweight/obesity and metabolic syndrome
Source: PubMed Central journal article supplement (PMC11167471; doi:10.5114/biolsport.2024.133005), 2023-12-20
Supplement: JBS-41-51833-s1.pdf [file JBS-41-51833-s1.pdf]

**SUPPLEMENTARY TABLE 1.** Alpha diversity measurements in gut microbiota within each group T1, T2, and T3 after 1-year of intervention and, as well as, across the three groups.

|                     | Faith_pd <i>p-value</i> | Observed features <i>p-value</i> | Pielou-Evenness <i>p-value</i> |
|---------------------|-------------------------|----------------------------------|--------------------------------|
| T1 (n = 99)         | 0.981                   | 0.722                            | 0.319                          |
| T2 (n = 99)         | 0.701                   | 0.780                            | 0.574                          |
| T3 (n = 99)         | 0.675                   | 0.720                            | 0.055                          |
| Across three groups | 0.438                   | 0.758                            | 0.122                          |

**SUPPLEMENTARY TABLE 2.** List of the predicted pathways between three groups.

| BioCyc Pathway ID         | Pathway                                                                    |
|---------------------------|----------------------------------------------------------------------------|
| PWY-6562                  | norspermidine biosynthesis                                                 |
| BRANCHED-CHAIN-AA-SYN-PWY | superpathway of branched chain amino acid biosynthesis                     |
| ILEUSYN-PWY               | L-isoleucine biosynthesis I (from threonine)                               |
| PWY-2942                  | L-lysine biosynthesis III                                                  |
| PWY-5101                  | L-isoleucine biosynthesis II                                               |
| PWY-5103                  | L-isoleucine biosynthesis III                                              |
| PWY-5104                  | L-isoleucine biosynthesis IV                                               |
| PWY-6630                  | superpathway of L-tyrosine biosynthesis                                    |
| VALSYN-PWY                | L-valine biosynthesis                                                      |
| PWY-6628                  | superpathway of L-phenylalanine biosynthesis                               |
| PWY-5505                  | L-glutamate and L-glutamine biosynthesis                                   |
| PWY0-1241                 | ADP-L-glycero-β;-D-manno-heptose biosynthesis                              |
| OANTIGEN-PWY              | O-antigen building blocks biosynthesis ( <i>E. coli</i> )                  |
| KDO-NAGLIPASYN-PWY        | superpathway of (Kdo) <sub>2</sub> -lipid A biosynthesis                   |
| PWY-5265                  | peptidoglycan biosynthesis II (staphylococci)                              |
| PWY-6891                  | thiazole component of thiamine diphosphate biosynthesis II                 |
| PWY-6895                  | superpathway of thiamine diphosphate biosynthesis II                       |
| PWY-7377                  | cob(II)yrinate <i>a,c</i> -diamide biosynthesis I (early cobalt insertion) |
| PYRIDNUCSAL-PWY           | NAD salvage pathway I (PNC VI cycle)                                       |
| LPSSYN-PWY                | superpathway of lipopolysaccharide biosynthesis                            |
| P125-PWY                  | superpathway of ( <i>R, R</i> )-butanediol biosynthesis                    |
| PWY-5910                  | superpathway of geranylgeranyldiphosphate biosynthesis I (via mevalonate)  |
| PWY-5757                  | fosfomycin biosynthesis                                                    |
| PWY-922                   | mevalonate pathway I (eukaryotes and bacteria)                             |
| AEROBACTINSYN-PWY         | aerobactin biosynthesis                                                    |
| ENTBACSYN-PWY             | enterobactin biosynthesis                                                  |
| PWY-7431                  | aromatic biogenic amine degradation (bacteria)                             |
| CRNFORCAT-PWY             | creatinine degradation I                                                   |
| ORNDEG-PWY                | superpathway of ornithine degradation                                      |
| PWY-5705                  | allantoin degradation to glyoxylate III                                    |
| PWY-5499                  | vitamin B <sub>6</sub> degradation                                         |

SUPPLEMENTARY TABLE 2. Continue.

|                              |                                                                          |
|------------------------------|--------------------------------------------------------------------------|
| <b>PWY0-1533</b>             | methylphosphonate degradation I                                          |
| <b>GALACTARDEG-PWY</b>       | D-galactarate degradation I                                              |
| <b>GLUCARDEG-PWY</b>         | D-glucarate degradation I                                                |
| <b>GOLPDLAT-PWY</b>          | superpathway of glycerol degradation to 1,3-propanediol                  |
| <b>AST-PWY</b>               | L-arginine degradation II (AST pathway)                                  |
| <b>ARGDEG-PWY</b>            | superpathway of L-arginine, putrescine, and 4-aminobutanoate degradation |
| <b>ORNARGDEG-PWY</b>         | superpathway of L-arginine and L-ornithine degradation                   |
| <b>BENZCOA-PWY</b>           | anaerobic aromatic compound degradation ( <i>Thauera aromatica</i> )     |
| <b>GLUCARGALACTSUPER-PWY</b> | superpathway of D-glucarate and D-galactarate degradation                |
| <b>PWY-6588</b>              | pyruvate fermentation to acetone                                         |
| <b>PWY-7111</b>              | pyruvate fermentation to isobutanol (engineered)                         |
| <b>PWY-5100</b>              | pyruvate fermentation to acetate and lactate II                          |
| <b>NONOXIPENT-PWY</b>        | pentose phosphate pathway (non-oxidative branch) I                       |
| <b>PWY-7254</b>              | TCA cycle VII (acetate-producers)                                        |
